# Supplementary material for: Photoperiod Following Inoculation of Arabidopsis with Pyricularia oryzae (syn. Magnaporthe oryzae) Influences on the Plant–Pathogen Interaction
Source: MDPI journal article supplement (doi:10.3390/ijms22095004), 2021-05-08
Supplement: s1 [file s1]

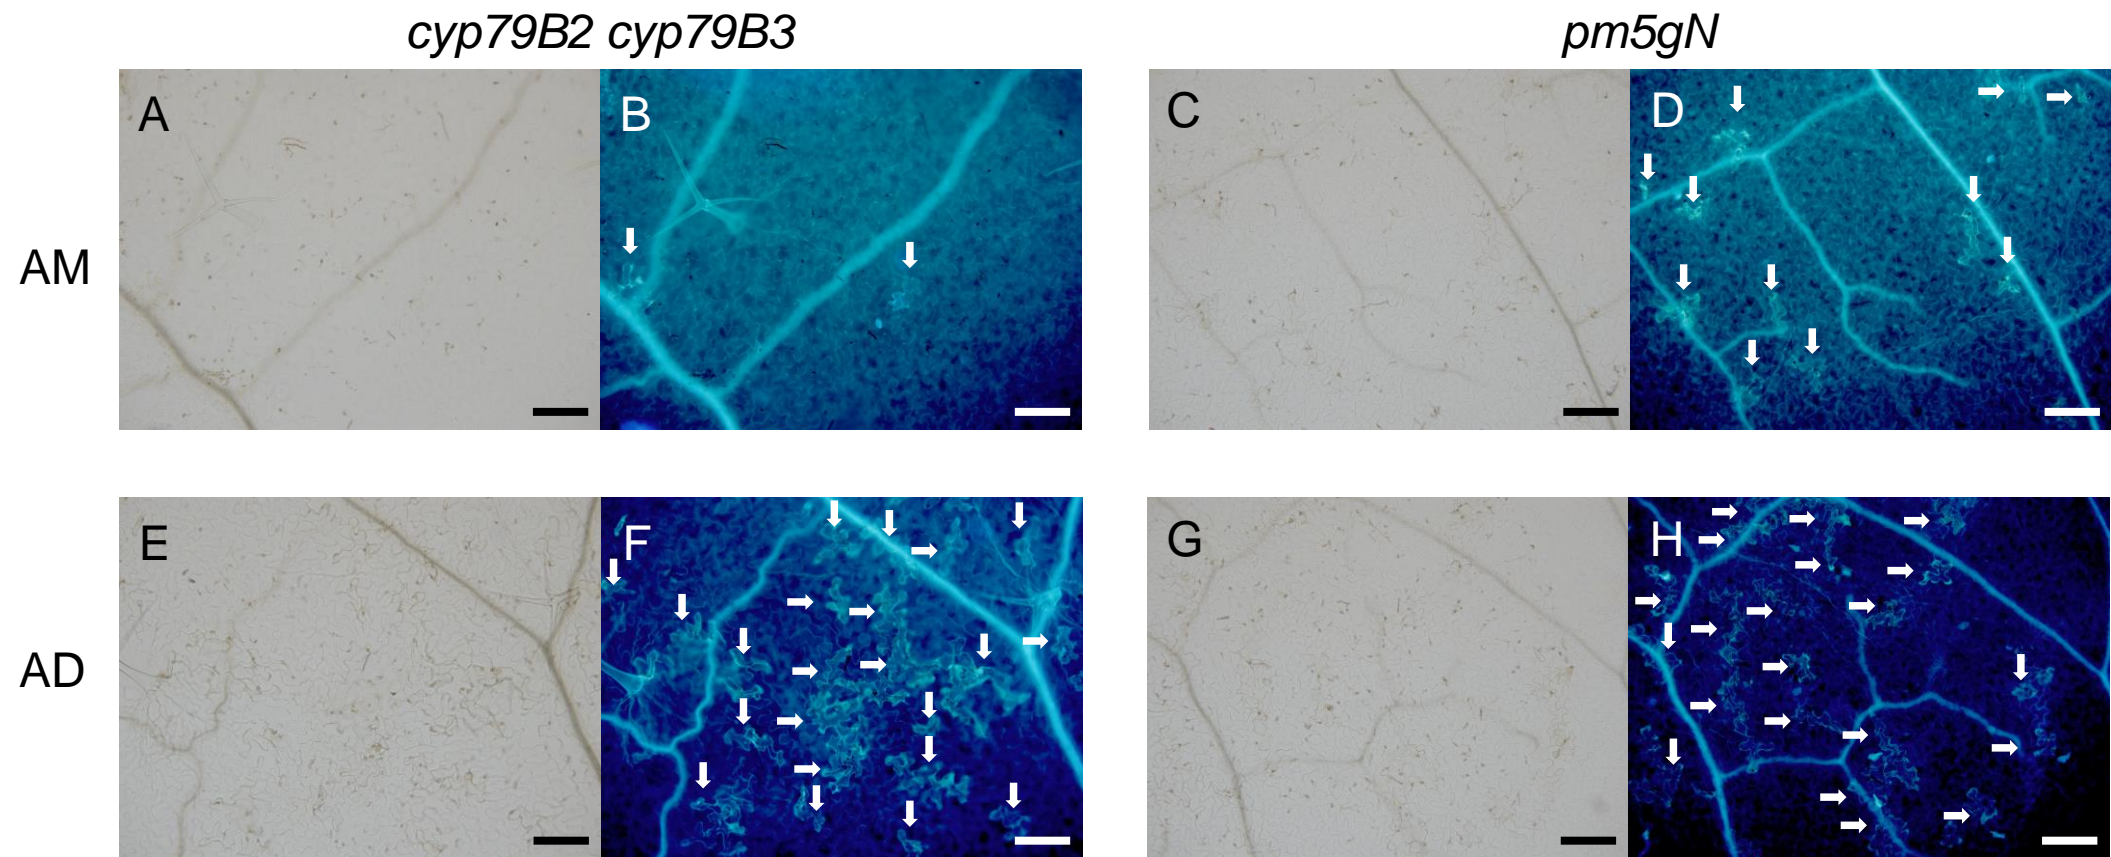

Figure S1. Plant response to *P. oryzae* infection.

Light microscopic view of infection sites of *cyp79B2 cyp79B3* (A, E) and *pm5gN* (C, G) plants at 72 hpi. Cell death associated autofluorescence at infection sites of *cyp79B2 cyp79B3* (B, F) and *pm5gN* (D, H) plants as visualized by fluorescence microscopy. AM inoculation (A-D). AD inoculation (E-H). White arrow indicates a penetrated epidermal cell. Bar, 0.2 mm.

Table S1

List of Arabidopsis mutants used to construct *pen2-1* double mutants

| Mutant             | Function                          | Reference |
|--------------------|-----------------------------------|-----------|
| <i>pen2-1</i>      | myrosinase                        | 1         |
| <i>pad1</i>        | JA signaling                      | 2         |
| <i>jar1</i>        | JA signaling                      | 3         |
| <i>pmr5</i>        | putative pectin acetyltransferase | 4         |
| <i>sobir1</i>      | pattern recognition receptor      | 5         |
| <i>atrbohD</i>     | NADPH oxidase                     | 6         |
| <i>atrbohF</i>     | NADPH oxidase                     | 6         |
| <i>35S:AtRbohD</i> | NADPH oxidase                     | 7         |
| <i>pad3</i>        | camalexin synthesis               | 8         |
| <i>pen3</i>        | ABC transporter                   | 9,10      |

1. Lipka, V., J. Dittgen, P. Bednarek, R. Bhat, M. Wiermer, M. Stein, J. Landtag, W. Brandt, S. Rosahl, D. Scheel, et al., *Pre- and postinvasion defenses both contribute to nonhost resistance in Arabidopsis*. Science, 2005. **310**(5751): p. 1180-3.
2. Glazebrook, J. and F.M. Ausubel, *Isolation of phytoalexin-deficient mutants of Arabidopsis thaliana and characterization of their interactions with bacterial pathogens*. Proc Natl Acad Sci U S A, 1994. **91**(19): p. 8955-9.
3. Staswick, P.E., W. Su, and S.H. Howell, *Methyl jasmonate inhibition of root growth and induction of a leaf protein are decreased in an Arabidopsis thaliana mutant*. Proc Natl Acad Sci U S A, 1992. **89**(15): p. 6837-40.
4. Vogel, J.P., T.K. Raab, C.R. Somerville, and S.C. Somerville, *Mutations in PMR5 result in powdery mildew resistance and altered cell wall composition*. Plant J, 2004. **40**(6): p. 968-78.
5. Gao, M., X. Wang, D. Wang, F. Xu, X. Ding, Z. Zhang, D. Bi, Y.T. Cheng, S. Chen, X. Li, et al., *Regulation of cell death and innate immunity by two receptor-like kinases in Arabidopsis*. Cell Host Microbe, 2009. **6**(1): p. 34-44.
6. Torres, M.A., J.L. Dangl, and J.D.G. Jones, *Arabidopsis gp91(phox) homologues AtrbohD and AtrbohF are required for accumulation of reactive oxygen intermediates in the plant defense response*. Proceedings of the National Academy of Sciences of the United States of America, 2002. **99**(1): p. 517-522.
7. Torres, M.A., J.D.G. Jones, and J.L. Dangl, *Pathogen-induced, NADPH oxidase-derived reactive oxygen intermediates suppress spread of cell death in Arabidopsis thaliana*. Nature Genetics, 2005. **37**(10): p. 1130-1134.
8. Zhou, N., T.L. Tootle, and J. Glazebrook, *Arabidopsis PAD3, a gene required for camalexin biosynthesis, encodes a putative cytochrome P450 monooxygenase*. Plant Cell, 1999. **11**(12): p. 2419-2428.
9. Kobae, Y., T. Sekino, H. Yoshioka, T. Nakagawa, E. Martinoia, and M. Maeshima, *Loss of AtPDR8, a plasma membrane ABC transporter of Arabidopsis thaliana, causes hypersensitive cell death upon pathogen infection*. Plant Cell Physiol, 2006. **47**(3): p. 309-18.
10. Stein, M., J. Dittgen, C. Sanchez-Rodriguez, B.H. Hou, A. Molina, P. Schulze-Lefert, V. Lipka, and S. Somerville, *Arabidopsis PEN3/PDR8, an ATP binding cassette transporter, contributes to nonhost resistance to inappropriate pathogens that enter by direct penetration*. Plant Cell, 2006. **18**(3): p. 731-46.
